# Supplementary material for: Similarities and differences in spatial and non-spatial cognitive maps
Source: PubMed Central journal article supplement (PMC7480875; doi:10.1371/journal.pcbi.1008149), 2020-09-09
Supplement: pcbi.1008149.s013.pdf [file pcbi.1008149.s013.pdf]

| <i>Predictors</i>          | Distance Between Choices |                | Distance from Initial Position |                |
|----------------------------|--------------------------|----------------|--------------------------------|----------------|
|                            | <i>Est.</i>              | <i>95% HPD</i> | <i>Est.</i>                    | <i>95% HPD</i> |
| Intercept                  | 7.04                     | 6.77 – 7.31    | 4.21                           | 4.00 – 4.41    |
| PreviousReward             | -0.06                    | -0.06 – -0.06  | 0.01                           | 0.01 – 0.01    |
| Spatialtask                | 1.03                     | 0.68 – 1.38    | -0.2043                        | -0.67 – -0.18  |
| PreviousReward:Spatialtask | -0.01                    | -0.02 – -0.01  | 0.01                           | 0.004 – 0.01   |
| <b>Random Effects</b>      |                          |                |                                |                |
| $\sigma^2$                 | 1.10                     |                | 1.08                           |                |
| $\tau_{00}$                | 7.22                     |                | 8.34                           |                |
| N                          | 129                      |                | 129                            |                |
| Observations               | 44118                    |                | 44118                          |                |
| Bayesian $R^2$             | .539                     |                | .118                           |                |

*Note:* We report the posterior median (Est.) and 95% highest posterior density (HPD) interval.  $\sigma^2$  indicates the individual-level variance and  $\tau_{00}$  indicates the variation between individual intercepts and the average intercept. See Methods for full specification of model structure and priors.
