# Supplementary material for: Similarities and differences in spatial and non-spatial cognitive maps
Source: PubMed Central journal article supplement (PMC7480875; doi:10.1371/journal.pcbi.1008149), 2020-09-09
Supplement: pcbi.1008149.s014.pdf [file pcbi.1008149.s014.pdf]

| <i>Predictors</i>               | Model Prediction |                | Model Uncertainty |                |
|---------------------------------|------------------|----------------|-------------------|----------------|
|                                 | <i>Est.</i>      | <i>95% HPD</i> | <i>Est.</i>       | <i>95% HPD</i> |
| Intercept                       | 12.42            | 10.45 – 14.34  | 0.92              | 0.86 – 0.98    |
| ParticipantJudgment             | 0.82             | 0.75 – 0.89    | -0.02             | -0.02 – -0.01  |
| Spatialtask                     | 1.34             | -0.33 – 3.04   | 0.002             | -0.08 – 0.08   |
| ParticipantJudgment:Spatialtask | 0.03             | -0.04 – 0.11   | -0.01             | -0.02 – 0.001  |
| <b>Random Effects</b>           |                  |                |                   |                |
| $\sigma^2$                      | 183.49           |                | 0.06              |                |
| $\tau_{00}$                     | 346.35           |                | 0.03              |                |
| N                               | 129              |                | 129               |                |
| Observations                    | 2580             |                | 2580              |                |
| Bayesian $R^2$                  | .437             |                | .674              |                |

*Note:* We report the posterior median (Est.) and 95% highest posterior density (HPD) interval. In the first model (Model Prediction), participant judgments in the range [1,100] are used to predict the GP posterior mean, whereas the second model (Model Uncertainty) uses confidence judgments in the range [1,11] to predict the GP posterior variance. All GP posteriors are computed based on individual participant  $\lambda$ -values, estimated from the corresponding bandit task.  $\sigma^2$  indicates the individual-level variance and  $\tau_{00}$  indicates the variation between individual intercepts and the average intercept. See Methods for full specification of model structure and priors.
